# Supplementary material
Source: PubMed Central journal article supplement (PMC5786784)
Supplement: AAC.02205-17_zac002186895s1.pdf [file AAC.02205-17_zac002186895s1.pdf]

## SUPPLEMENTAL MATERIAL

**Chemistry General Experimental.** Uncorrected melting points were measured on a Thomas-Hoover capillary melting point apparatus. H-NMR spectra were recorded on a Varian Gemini 2000 spectrometer (300 MHz) in dimethyl-*d*<sub>6</sub> sulfoxide (1). Anhydrous EtOH was distilled over Mg/I<sub>2</sub> immediately prior to use. Other anhydrous solvents (in Sure/Seal<sup>®</sup> containers) and organic starting materials and were purchased from Sigma-Aldrich Chemical, Milwaukee, WI, and were used without further purification. Reaction mixtures were monitored by thin-layer chromatography (TLC) on silica gel or by reverse-phase high-performance liquid chromatography (HPLC). Organic layers of extraction mixtures were neutralized as necessary with acidic or basic washes, washed with saturated NaCl solution, and dried over Na<sub>2</sub>SO<sub>4</sub> or MgSO<sub>4</sub> before being evaporated under reduced pressure. Gravity and flash column chromatography were performed using Davisil grade 633, type 60A silica gel (200-425 mesh). Analytical HPLC chromatograms were recorded on an Agilent 1200 Series chromatograph using a Zorbax Rx C8 column (4.6 mm × 75 mm, 3.5 μm) and UV photodiode array detection at 230, 254, 265, 290, and 320 nm. Wavelengths reported are those at which the strongest signals of the major products were observed. Mobile phases consisted of mixtures of CH<sub>3</sub>CN (0–75%) or CH<sub>3</sub>OH (0–95%) in water containing formic acid (80 mM), ammonium formate (20 mM), and triethylamine (15 mM) using appropriate gradients. Flow rates were maintained at 1.5 mL/min at a column temperature of 40 °C. Preparative reverse-phase HPLC was performed on a Varian ProStar chromatography workstation configured with two PS-215 pumps fitted with 50 mL pump heads, a Dynamax Microsorb C18 (60 Å) column (41.4 mm × 25 cm, 8 μm), PS-320 variable wavelength UV-vis detector, and a PS-701 fraction collector. Mobile phases consisted of mixtures of CH<sub>3</sub>CN (0-75%) or CH<sub>3</sub>OH (0–95%) in water containing formic acid (40

mM) and ammonium formate (10 mM). Flow rates were maintained at 40 mL/min. Detector wavelengths and mobile-phase gradients were optimized for the individual compounds. Select fractions were analyzed for purity using a Zorbax Rx C8 column (4.6 mm × 75 mm, 3.5 μm) and the latter mobile phases on an Agilent Technologies 1100 chromatograph. Pooled purified fractions were evaporated under reduced pressure, reconstituted in water, and lyophilized (3 cycles) on a VirTis BenchTop 2K or 6K lyophilizer. Low-resolution electrospray ionization (ESI) mass spectra were recorded on an Agilent Technologies 1100 Series LC/MSD trap mass spectrometer. Elemental analyses were performed by Atlantic Microlab, Norcross, GA, and, unless stated otherwise, were within (0.4% of calculated values.

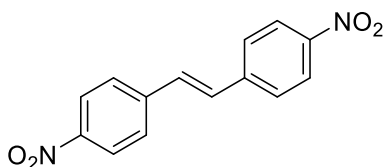

***trans*-4,4'-Dinitrostilbene** was prepared from 4-nitrobenzaldehyde and diethyl (4-nitrobenzyl)phosphonate following the procedure of Wu et al (1).

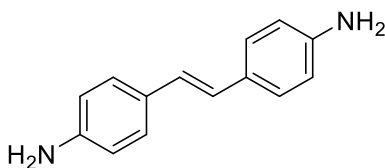

***trans*-4,4'-Diaminostilbene** was prepared from *trans*-4,4'-dinitrostilbene and tin(II) chloride dihydrate following the procedure of Wu et al (1).

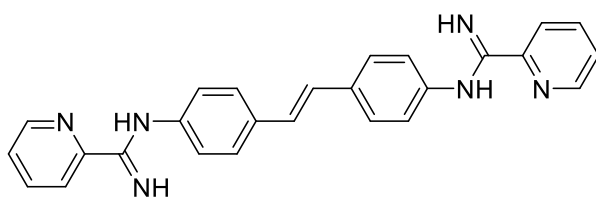

**(E)-N,N'-[Ethene-1,2-diylbis(4,1-phenylene)]dipicolinimidamide dihydrochloride trihydrate (27SMB 078).** A solution of *trans*-4,4'-diaminostilbene (1.50 g, 7.13 mmol) in dry THF (20 mL) was added dropwise to a solution of lithium bis(trimethylsilyl)amide in (1 M solution in THF, 15 mL, 15 mmol). The mixture was stirred for 20 min at ambient temperature before the addition of a solution of 2-cyanopyridine (1.56 g, 15.0 mmol) in THF (20 mL). The mixture was stirred overnight, diluted with water, and extracted into EtOAc. Combined extracts were washed with brine, dried (Na<sub>2</sub>SO<sub>4</sub>), and evaporated. The product was purified by preparative HPLC followed by conversion to the HCl salt to give a solid (1.10 g, 31%): mp 310-311 °C dec; <sup>1</sup>H NMR (300 MHz, DMSO-*d*<sub>6</sub>) δ 11.83, (s, 1H), 10.08 (s, 1H), 9.33 (s, 1H), 8.91(d, *J* = 4.4 Hz, 2H), 8.45 (d, *J* = 7.9 Hz), 8.23 (dt, *J* = 7.8, 1.5 Hz, 2H), 7.89–7.83 (m, 6H), 7.53–4.78 (m, 6H); EIMS *m/z* 419 (M + 1)<sup>+</sup>; HPLC 100 area % (254 nm). Anal. Calcd for C<sub>26</sub>H<sub>22</sub>N<sub>6</sub>·2HCl·3H<sub>2</sub>O: C, 57.25; H, 5.54; N, 15.41; Cl, 13.00. Found: C, 57.09; H, 5.53; N, 15.21; Cl, 12.91.

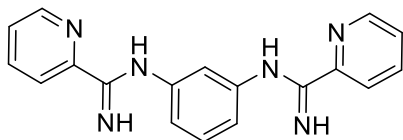

**N,N'-(1,3-Phenylene)dipicolinimidamide dihydrochloride dihydrate (28SMB032)** was prepared analogously to 27SMB078 from 1,3-phenylenediamine (2.00 g, 18.5 mmol) and 2-cyanopyridine (4.00 g, 38.0 mmol) but using sodium bis(trimethylsilyl)amide in place of the lithium salt. Purification by preparative HPLC followed by conversion to the HCl salt gave a solid (2.80 g, 78%): mp 189-193 °C; <sup>1</sup>H NMR (300 MHz, DMSO-*d*<sub>6</sub>) δ 12.07, (s, 1H), 10.40 (s, 2H), 9.62 (s, 2H), 8.91(d, *J* = 4.2 Hz, 2H), 8.62 (d, *J* = 7.5 Hz), 8.24 (t, *J* = 7.6 Hz, 2H), 7.89–7.85 (m, 2H), 7.79–7.75 (m, 2H), 7.56 (d, *J* = 8.0 Hz, 2H); EIMS *m/z* 317 (M + 1)<sup>+</sup>; HPLC 100 area % (230 nm).

Anal. Calcd for  $C_{18}H_{18}N_6 \cdot 2.3HCl \cdot 2H_2O$ : C, 49.56; H, 5.15; N, 19.26; Cl, 18.69.

Found: C, 49.53; H, 4.91; N, 19.08; Cl, 18.37.

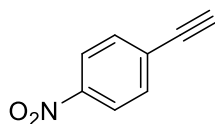

**1-Ethynyl-4-nitrobenzene** (2) was prepared from 4-bromonitrobenzene using Sonogashira–deprotection strategy following the procedure of Zhao et al (3). but the deprotection step was affected using sodium hydride (4).

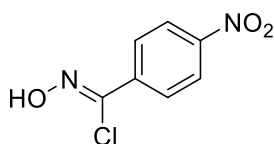

*N*-Hydroxy-4-nitrobenzimidoyl chloride (5) was prepared in two steps beginning with the oximation of 4-nitrobenzaldehyde using hydroxylamine hydrochloride followed by chlorination using *N*-chlorosuccinimide (4).

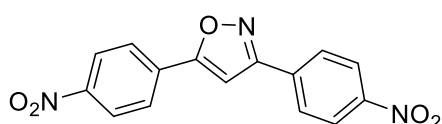

**3,5-Bis(4-nitrophenyl)isoxazole** (6) was prepared from 1-ethynyl-4-nitrobenzene and *N*-hydroxy-4-nitrobenzimidoyl chloride in the presence of bis(tributyltin) oxide (4).

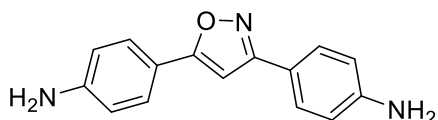

**3,5-Bis(4-aminophenyl)isoxazole** (7) was prepared by the by the reduction of 3,5-bis(4-nitrophenyl)isoxazole with tin(II) chloride dihydrate in ethanol.

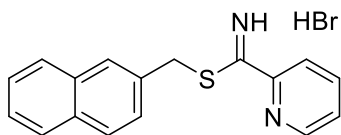

**Naphthalen-2-ylmethyl pyridine-2-carbimidothioate hydrobromide** was prepared by an established method (8).

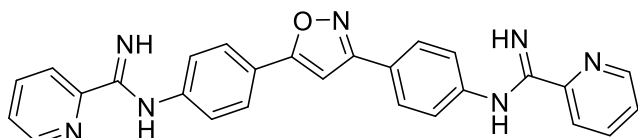

***N,N'*-[isoxazole-3,5-diylbis(4,1-phenylene)]dipicolinimidamide trihydrochloride monohydrate (31DAP 069)**. Crude naphthalen-2-ylmethyl pyridine-2-carbimidothioate hydrobromide (3.88 g, 10.8 mmol) was added to a mixture of 3,5-bis(4-aminophenyl)isoxazole (1.26 g, 4.99 mmol) in dry acetonitrile (50 mL) and freshly distilled ethanol (50 mL) that was cooled in an ice–salt bath. The mixture was stirred at ambient temperature for 4 days before being evaporated to near dryness. The residue was stirred in hot water (ca. 300 mL) and the mixture was gravity filtered. Two crops of precipitate were recovered directly from the filtrate, and a third crop was obtained after basification of the filtrate (pH 9) using NaOH solution. Combined solids were purified by preparative HPLC. The product was converted to the HCl salt using ethanolic HCl and ether to give a pale yellow solid (1.06 g, 40%): mp 280 °C; <sup>1</sup>H NMR (300 MHz, DMSO-*d*<sub>6</sub>) δ 12.03, (s, 1H), 10.28 (s, 1H), 10.25 (s, 1H), 9.54 (s, 1H), 9.50 (s, 1H), 8.92(d, *J* = 4.1 Hz, 2H), 8.52 (dd, *J* = 8.3 and 1.2 Hz 2H), 8.25 (dt, *J* = 8.1 and 1.1 Hz, 2H), 8.14 (d, *J* = 8.0 Hz, 4 H), 7.89–7.86 (m, 3H), 7.74–7.69 (m, 4H); EIMS *m/z* 460 (M + 1)<sup>+</sup>; HPLC 100 area % (290 nm). Anal. Calcd for C<sub>27</sub>H<sub>21</sub>N<sub>7</sub>O·2.8HCl·1.2H<sub>2</sub>O: C, 55.60; H, 4.53; N, 16.81; Cl, 17.02. Found: C, 55.39; H, 4.36; N, 16.70; Cl, 17.29.

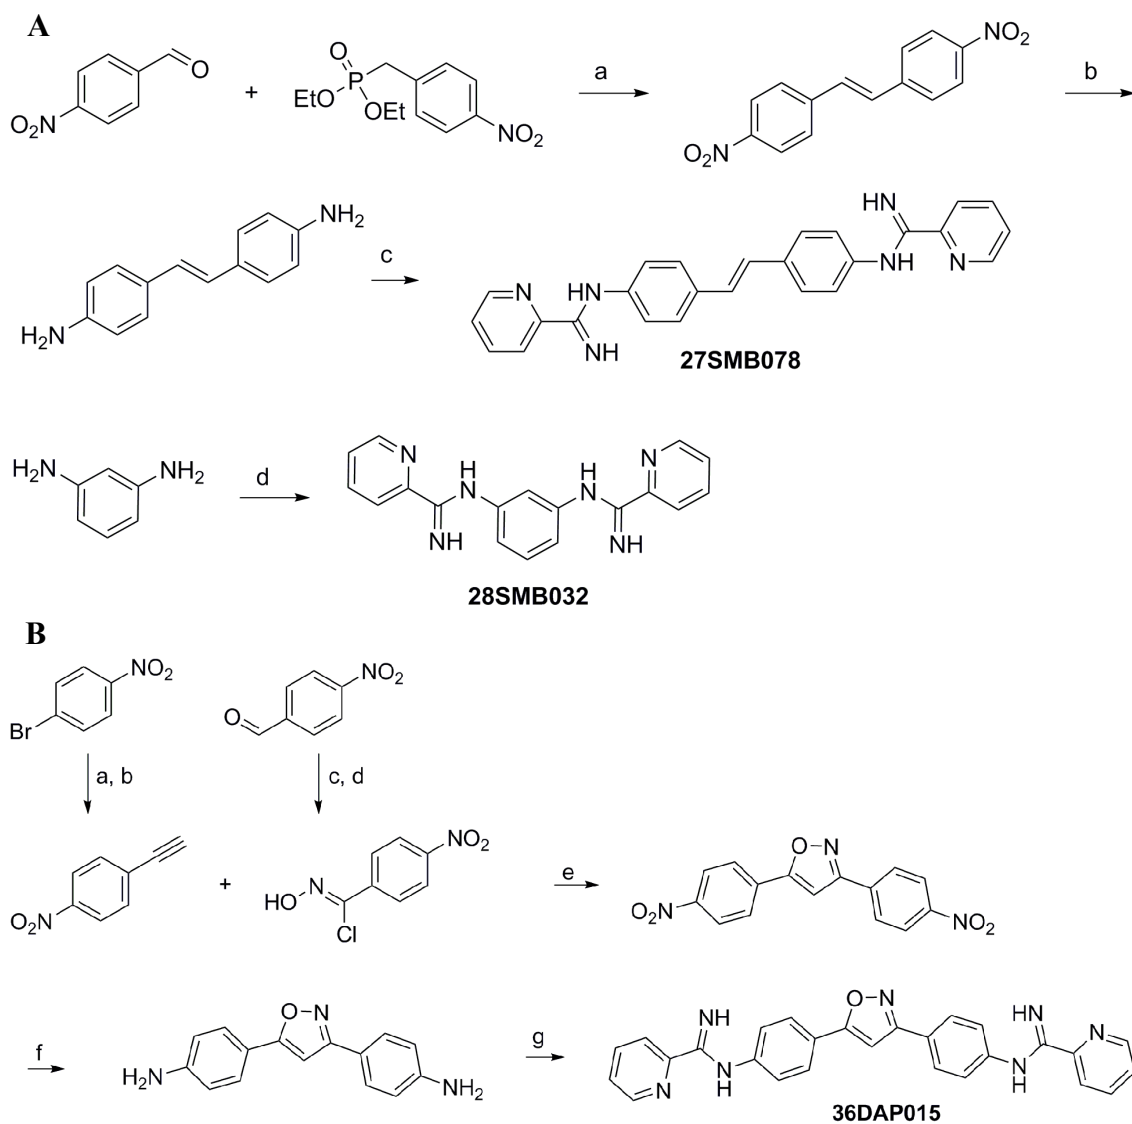

Fig S1 **A** Synthesis of 27SMB078, and 28SMB032. Reagents and conditions: (a) NaOMe, DMF; (b) SnCl<sub>2</sub>·2H<sub>2</sub>O, EtOH; (c) 2-cyanopyridine, LiN[Si(CH<sub>3</sub>)<sub>3</sub>]<sub>2</sub>, THF; (d) 2-cyanopyridine, NaN[Si(CH<sub>3</sub>)<sub>3</sub>]<sub>2</sub>, THF. **B** Synthesis of 31DAP069. Reagents and conditions: (a) 2-methyl-3-butyn-2-ol, PdCl<sub>2</sub>(PPh<sub>3</sub>)<sub>2</sub>, CuI, Et<sub>3</sub>N; (b) NaH, toluene; (c) NH<sub>2</sub>OH·H<sub>2</sub>O, EtOH, H<sub>2</sub>O; (d) N-chlorosuccinimide, DMF; (e) bis(tributyl)in oxide, CH<sub>2</sub>Cl<sub>2</sub>; (f) SnCl<sub>2</sub>·2H<sub>2</sub>O, EtOH; (g) naphthalen-2-ylmethyl pyridine-2-carbimidothioate hydrobromide, CH<sub>3</sub>CN, EtOH.

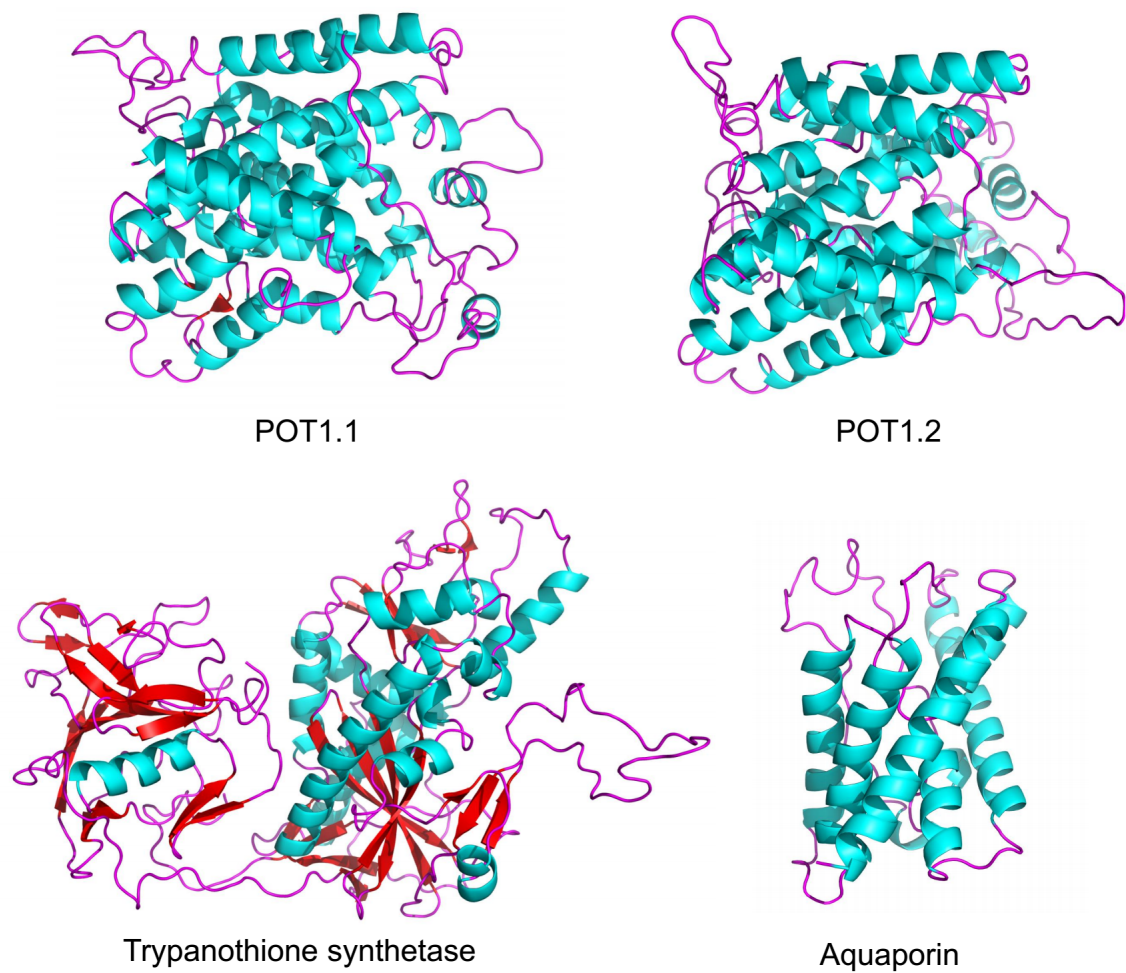

Fig S2 3D structures of selected homology models (minimized proteins) developed with SWISS-MODEL server.

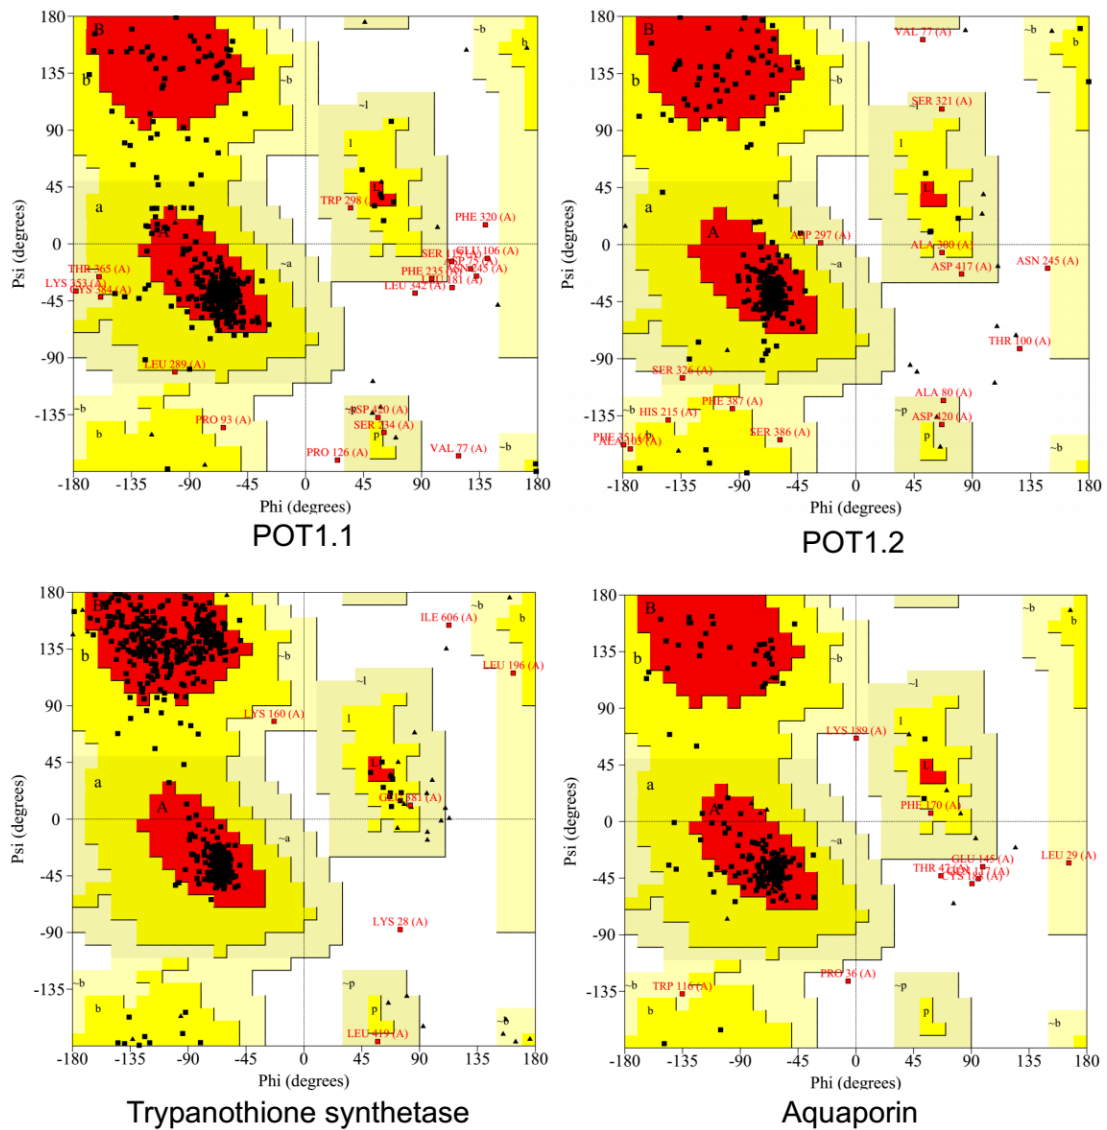

Fig S3 Ramachandran plots for some *T. cruzi* candidates obtained by PROCHECK, showing the dihedral angles Psi and Phi of amino acid residues. Red represents most favored regions; yellow represents additional allowed regions; beige represents generously allowed regions; and white areas are disallowed regions.



Table S1 EC<sub>50</sub> and FICI of 28SMB032/Bz combinations against intracellular forms from Tulahuen β-galactosidase strain of *T. cruzi*

| Drug ratio of 28SMB032:Bz | EC <sub>50</sub> <sup>a</sup> (μM) |                 | FICI     |      | ΣFICI | xΣFICI |
|---------------------------|------------------------------------|-----------------|----------|------|-------|--------|
|                           | 28SMB032                           | Bz              | 28SMB032 | Bz   |       |        |
| Intracellular forms       |                                    |                 |          |      |       |        |
| 5:0                       | 0.17(0.14-0.21)                    |                 |          |      |       |        |
| 4:1                       | 0.18(0.15-0.21)                    | 0.07(0.06-0.08) | 1.08     | 0.02 | 1.10  | 0.95   |
| 3:2                       | 0.19(0.16-0.23)                    | 0.20(0.17-0.24) | 1.13     | 0.05 | 1.18  |        |
| 2:3                       | 0.12(0.09-0.18)                    | 0.30(0.21-0.43) | 0.74     | 0.07 | 0.81  |        |
| 1:4                       | 0.10(0.08-0.14)                    | 0.64(0.47-0.89) | 0.62     | 0.15 | 0.77  |        |
| 0:5                       |                                    | 4.36(3.12-6.10) |          |      |       |        |

<sup>a</sup>Standard Error of the Mean (SEM): 95%CI

Table S2 *In silico* predicted ADMET properties for studied compounds

| Properties                               | Compounds        |                  |                  |                  |                  |
|------------------------------------------|------------------|------------------|------------------|------------------|------------------|
|                                          | 2EVK008          | 27SMB078         | 28SMB032         | 31DAP069         | 36DAP015         |
| Human Intestinal absorption <sup>a</sup> | >30%             | >30%             | >30%             | >30%             | >30%             |
| Volume of distribution <sup>b</sup>      | 6.97 L/kg        | 4.09 L/kg        | 2.48 L/kg        | 2.84 L/kg        | 8.66 L/kg        |
| CYP3A4 inhibitor <sup>a</sup>            | Non-inhibitor    | Non-inhibitor    | Non-inhibitor    | Inhibitor        | Non-inhibitor    |
| CYP2D6 inhibitor <sup>a</sup>            | Non-inhibitor    | Non-inhibitor    | Non-inhibitor    | Non-inhibitor    | Inhibitor        |
| CYP2C19 inhibition <sup>a</sup>          | Inhibitor        | Non-inhibitor    | Non-inhibitor    | Non-inhibitor    | Inhibitor        |
| CYP2C9 inhibition <sup>a</sup>           | Non-inhibitor    | Non-inhibitor    | Non-inhibitor    | Non-inhibitor    | Non-inhibitor    |
| CYP1A2 inhibition <sup>a</sup>           | Inhibitor        | Non-inhibitor    | Non-inhibitor    | Inhibitor        | Non-inhibitor    |
| Acute Oral toxicity <sup>c</sup>         | 500 mg/Kg        | 195 mg/Kg        | 195 mg/Kg        | 1012 mg/Kg       | 375 mg/Kg        |
| AMES toxicity <sup>a</sup>               | Non-mutagenic    | Mutagenic        | Mutagenic        | Mutagenic        | Mutagenic        |
| Carcinogenicity <sup>a</sup>             | Non-carcinogenic | Non-carcinogenic | Non-carcinogenic | Non-carcinogenic | Non-carcinogenic |
| Genotoxicity <sup>c</sup>                | Non-genotoxic    | Non-genotoxic    | Non-genotoxic    | Non-genotoxic    | Non-genotoxic    |
| hERG blockage <sup>d</sup>               | Non-blocker      | Non-blocker      | Non-blocker      | Non-blocker      | Non-blocker      |

Predictions based on: <sup>a</sup>admetSAR (27), <sup>b</sup>ACD/I-Lab (<https://ilab.acdlabs.com/iLab2/>), <sup>c</sup>PROTOX (34), and <sup>d</sup>Pred-hERG (32).

Table S3 Summary of statistic results of *T. cruzi* homology model proteins

| Target<br>(UniProt ID)            | Template information |                   |          | PROCHECK analysis    |                            |                           |                    |
|-----------------------------------|----------------------|-------------------|----------|----------------------|----------------------------|---------------------------|--------------------|
|                                   | Coverage             | Sequence Identity | Template | Most favored regions | Additional allowed regions | Generously allowed region | Disallowed regions |
| Aquaporin (Q8MXA3)                | 87%                  | 38%               | 2NE2     | 84.7%                | 10.6%                      | 1.8%                      | 2.9%               |
| Trypanothione synthetase (Q9GT49) | 97%                  | 60%               | 2VOB     | 92.7%                | 6.2%                       | 0.7%                      | 0.4%               |
| POT1.1 (B2CQQ7)                   | 64%                  | 27%               | 3OB6     | 83.4%                | 12.2%                      | 2.2%                      | 2.2%               |
| POT1.2 (Q4D143)                   | 63%                  | 26%               | 3L1L     | 86.1%                | 9.7%                       | 3.3%                      | 0.8%               |

Table S4 Details of *T. cruzi* target candidates and size of the grid used in target fishing study.

| Target candidate (UniProt ID)                         | Source              | PDB ID (Resolution) | Grid information         |                            |
|-------------------------------------------------------|---------------------|---------------------|--------------------------|----------------------------|
|                                                       |                     |                     | Dimensions (x, y, z)     | Dock ligands with length ≤ |
| Acidocalcisomal pyrophosphatase (Q4JH30)              | PDB                 | 5CUU (2.96 Å)       | -16.69 x 37.22 x -12.42  | 22 Å                       |
| Aquaporin (Q8MXA3)                                    | Bibliography search | Homology model      | 1.17 x 32.49 x -2.86     | 20 Å                       |
| Arginine kinase (O96507)                              | PDB                 | 2J1Q (1.90 Å)       | 58.88 x 32.00 x 62.50    | 20 Å                       |
| Cruzain (P25779)                                      | PDB                 | 3KKU (1.28 Å)       | -4.49 x -33.45 x 3.63    | 18 Å                       |
| Cyclophilin (Q4DPB9)                                  | PDB                 | 1XQ7 (2.07 Å)       | 46.46 x 40.68 x 9.16     | 20 Å                       |
| Deoxyribonucleic acid                                 | Bibliography search | 1PRP (2.10 Å)       | 10.11 x 22.79 x 8.68     | 24 Å                       |
| Dihydrofolate reductase-Thymidylate synthase (Q8T5T8) | PDB                 | 3KJS (2.50 Å)       | 17.06 x -31.51 x 42.85   | 19 Å                       |
| Dihydroorotate dehydrogenase (Q4D3W2)                 | PDB                 | 3W88 (1.40 Å)       | 3.94 x -14.72 x -11.54   | 17 Å                       |
| Farnesyl diphosphate synthase (Q95WL3)                | PDB                 | 4DWG (2.01 Å)       | 11.80 x 19.87 x 174.00   | 18 Å                       |
| Farnesyltransferase (Q4CWB4)                          | PDB                 | 3WSB (2.40 Å)       | -33.58 x 48.96 x -43.49  | 20 Å                       |
| Glucokinase (Q4E4E1)                                  | PDB                 | 5BRH (1.90 Å)       | 19.81 x -10.75 x 61.82   | 20 Å                       |
| Glyceraldehyde-3-phosphate dehydrogenase (P22513)     | PDB                 | 1K3T (1.95 Å)       | 26.92 x 10.15 x 8.24     | 22 Å                       |
| Glucose-6-phosphate isomerase (Q4E5N1)                | PDB                 | 4QFH (1.80 Å)       | 24.82 x 57.35 x 12.14    | 20 Å                       |
| Histidyl-tRNA synthetase (Q4DA54)                     | PDB                 | 4YRC (2.10 Å)       | 64.39 x 8.09 x 19.17     | 20 Å                       |
| Hypoxanthine phosphoribosyltransferase (Q4DRC4)       | PDB                 | 1P19 (2.30 Å)       | 72.55 x 40.24 x 32.19    | 17 Å                       |
| Phosphodiesterase (Q53I60)                            | PDB                 | 3V94 (2.33 Å)       | -37.77 x -26.95 x -18.36 | 20 Å                       |
| POT1.1 (B2CQQ7)                                       | Bibliography search | Homology model      | 39.81 x -3.53 x 31.66    | 24 Å                       |

|                                              |                     |                |                          |      |
|----------------------------------------------|---------------------|----------------|--------------------------|------|
| POT1.2 (Q4D143)                              | Bibliography search | Homology model | 2.10 x 7.97 x 19.14      | 24 Å |
| Prostaglandin F2a synthase (Q8I6L9)          | PDB                 | 3ATZ (2.04 Å)  | 26.43 x 84.18 x 140.19   | 18 Å |
| Pteridine reductase 2 (Q8I814)               | PDB                 | 1MXF (2.30 Å)  | 17.36 x 52.13 x 24.71    | 22 Å |
| Pyruvate kinase (Q4D9Z4)                     | PDB                 | 4KS0 (2.80 Å)  | 16.59 x 8.55 x 30.06     | 22 Å |
| Ribose 5-phosphate isomerase type B (Q4CQE2) | PDB                 | 3K7S (1.90 Å)  | 35.27 x 23.46 x 11.47    | 20 Å |
| Spermidine synthase (Q4DA73)                 | Bibliography search | 4YUY (1.58 Å)  | 3.33 x 9.23 x 45.33      | 22 Å |
| Sterol 14-alpha demethylase (Q7Z1V1)         | PDB                 | 4C27 (1.95 Å)  | -7.02 x 11.01 x -18.21   | 17 Å |
| Superoxide dismutase (Q4DCQ3)                | PDB                 | 4DVH (2.23 Å)  | 18.80 x -4.57 x 19.54    | 20 Å |
| Trans-sialidase (Q26964)                     | PDB                 | 3B69 (1.67 Å)  | 7.02 x -18.82 x -6.13    | 18 Å |
| Triosephosphate isomerase (P52270)           | PDB                 | 1SUX (2.00 Å)  | 28.50 x 96.56 x 62.12    | 19 Å |
| Trypanothione reductase (K4E0T9)             | Bibliography search | 4NEW (2.80 Å)  | 93.11 x -19.35 x -118.80 | 17 Å |
| Trypanothione synthetase (Q9GT49)            | Bibliography search | Homology model | -35.24 x -1.01 x 11.46   | 20 Å |
| UDP-Galactopyranose mutase (Q4E1W2)          | PDB                 | 4DSG (2.25 Å)  | 70.18 x -15.83 x -29.06  | 20 Å |

## REFERENCES

1. Wu C, Wei J, Tian D, Feng Y, Miller RH, Wang Y. 2008. Molecular Probes for Imaging Myelinated White Matter in CNS. *J Med Chem* 51:6682-6688.
2. Gilbert JC, Weerasooriya U. 1982. Diazoethenes: their attempted synthesis from aldehydes and aromatic ketones by way of the Horner-Emmons modification of the Wittig reaction. A facile synthesis of alkynes. *J Org Chem* 47:1837-45.
3. Zhao W, Tong B, Pan Y, Shen J, Zhi J, Shi J, Dong Y. 2009. Fabrication, Electrochemical, and Optoelectronic Properties of Layer-by-Layer Films Based on (Phthalocyaninato)ruthenium(II) and Triruthenium Dodecacarbonyl Bridged by 4,4'-Bipyridine as Ligand. *Langmuir* 25:11796-11801.
4. Patrick DA, Bakunov SA, Bakunova SM, Kumar EVKS, Lombardy RJ, Jones SK, Bridges AS, Zhirnov O, Hall JE, Wenzler T, Brun R, Tidwell RR. 2007. Synthesis and in Vitro Antiprotozoal Activities of Dicationic 3,5-Diphenylisoxazoles. *J Med Chem* 50:2468-2485.
5. Hussein AQ, El-Abadelah MM, Sabri WS. 1983. Heterocycles from nitrile oxides. I. 5-Imino- $\Delta^2$ -1,4,2-oxathiazolines. *J Heterocycl Chem* 20:301-4.
6. Wei X, Fang J, Hu Y, Hu H. 1992. A convenient preparation of 3,5-diarylisoaxazoles. *Synthesis* 1205-6.
7. Musante C. 1951. Some derivatives of pyrazole and isoxazole having antituberculous action. *Farmaco (1946-1952)* 6:32-8.
8. Stephens CE, Tanious F, Kim S, Wilson WD, Schell WA, Perfect JR, Franzblau SG, Boykin DW. 2001. Diguanidino and "Reversed" Diamidino 2,5-Diarylfurans as Antimicrobial Agents. *J Med Chem* 44:1741-1748.
